# Supplementary material
Source: PubMed Central journal article supplement (PMC4038917)
Supplement: NIHMS58594-supplement-2.pdf [file NIHMS58594-supplement-2.pdf]

**ESM Table 2. Availability of specific categories of family history data by country: The EPIC-InterAct study.**

| Country             | Family History Variables |          |          |         |
|---------------------|--------------------------|----------|----------|---------|
|                     | Any 1st degree relative  | Maternal | Paternal | Sibling |
| France              | 765                      | 710      | 710      | 0       |
| UK                  | 1,746                    | 1619     | 1548     | 1544    |
| Netherlands         | 2,271                    | 1956     | 1745     | 1121    |
| Germany             | 1,699                    | 1512     | 1339     | 1292    |
| Sweden <sup>a</sup> | 4,320                    | 1959     | 1724     | 1574    |
| Denmark             | 3,068                    | 2623     | 2465     | 2294    |
| Total               | 13,869                   | 10379    | 9531     | 7825    |

<sup>a</sup> In Sweden, one centre (Umea) asked a single question about family history in any first degree relative. They were therefore included only in analyses of any first degree family member, and not in those requiring information on further degrees of family history.

**ESM Table. 3 SNPs included in the genetic risk score and quality metrics in the InterAct subcohort (N=11,400<sup>a</sup>)**

| Gene              | SNP#       | Strand HapMap | Effect/Risk Allele | Other Allele | Effect Allele Freq HapMap (%) | Effect Allele Freq InterAct (%) | Call Rate | HWE p-value |
|-------------------|------------|---------------|--------------------|--------------|-------------------------------|---------------------------------|-----------|-------------|
| <i>ADAMTS9</i>    | rs4607103  | +             | C                  | T            | 81                            | 73                              | 0.997     | 0.59        |
| <i>ADCY5</i>      | rs11708067 | +             | A                  | G            | 77                            | 80                              | 0.980     | 0.002       |
| <i>BCL11A</i>     | rs243021   | +             | A                  | G            | 48                            | 45                              | 0.997     | 0.003       |
| <i>CDC123</i>     | rs12779790 | +             | G                  | A            | 23                            | 18                              | 0.968     | <0.001      |
| <i>CDKAL1</i>     | rs10946398 | +             | C                  | A            | 34                            | 31                              | 0.990     | 0.14        |
| <i>CDKN2A/B</i>   | rs10811661 | +             | T                  | C            | 80                            | 81                              | 0.995     | 0.29        |
| <i>CDKN2A/B</i>   | rs564398   | +             | T                  | C            | 57                            | 59                              | 0.999     | 0.20        |
| <i>ARAP1</i>      | rs1552224  | +             | A                  | C            | 87                            | 85                              | 0.999     | 0.17        |
| <i>CHCHD9</i>     | rs13292136 | +             | C                  | T            | 93                            | 94                              | 0.999     | 0.007       |
| <i>DGKB</i>       | rs2191349  | +             | T                  | G            | 48                            | 55                              | 0.987     | 0.59        |
| <i>GCK</i>        | rs4607517  | +             | A                  | G            | 20                            | 18                              | 0.999     | 0.08        |
| <i>GCKR</i>       | rs780093   | +             | C                  | T            | 61                            | 58                              | 0.999     | 0.04        |
| <i>HHEX</i>       | rs1111875  | +             | C                  | T            | 58                            | 60                              | 0.998     | 0.70        |
| <i>HMGA2</i>      | rs1531343  | +             | C                  | G            | 12                            | 11                              | 0.999     | 0.33        |
| <i>HNF1A</i>      | rs7957197  | +             | T                  | A            | 85                            | 39                              | 0.998     | 0.11        |
| <i>HNF1B_TCF2</i> | rs4430796  | +             | G                  | A            | 51                            | 50                              | 0.999     | 0.39        |
| <i>IGF2BP2</i>    | rs4402960  | +             | T                  | G            | 30                            | 30                              | 0.988     | 0.85        |
| <i>IRS1</i>       | rs7578326  | +             | A                  | G            | 65                            | 64                              | 0.999     | 0.77        |
| <i>JAZF1</i>      | rs864745   | +             | T                  | C            | 49                            | 50                              | 0.991     | 85          |
| <i>KCNJ11</i>     | rs757110   | +             | C                  | A            | 39                            | 37                              | 0.984     | 0.40        |
| <i>KCNQ1</i>      | rs163184   | +             | G                  | T            | 44                            | 48                              | 0.999     | 0.50        |
| <i>KCNQ1</i>      | rs2237892  | +             | C                  | T            | 93                            | 94                              | 0.998     | <0.001      |
| <i>KLF14</i>      | rs972283   | +             | G                  | A            | 55                            | 55                              | 0.978     | 0.65        |
| <i>MTNR1B</i>     | rs10830963 | +             | G                  | C            | 30                            | 28                              | 0.976     | 0.21        |
| <i>NOTCH2</i>     | rs10923931 | +             | T                  | G            | 9                             | 11                              | 0.998     | 0.53        |
| <i>PPARg</i>      | rs1801282  | +             | C                  | G            | 90                            | 88                              | 0.999     | 0.007       |
| <i>PRCI</i>       | rs8042680  | +             | A                  | C            | 26                            | 33                              | 0.998     | 0.04        |
| <i>PROX1</i>      | rs340874   | +             | C                  | T            | 56                            | 54                              | 0.983     | 0.95        |
| <i>SLC30A8</i>    | rs13266634 | +             | C                  | T            | 75                            | 70                              | 0.990     | 0.05        |
| <i>TCF7L2</i>     | rs7903146  | +             | T                  | C            | 28                            | 30                              | 0.980     | 0.73        |
| <i>THADA</i>      | rs7578597  | +             | T                  | C            | 88                            | 90                              | 0.985     | 0.28        |
| <i>TSPAN8</i>     | rs7961581  | +             | C                  | T            | 25                            | 29                              | 0.993     | 0.77        |
| <i>WFS1</i>       | rs10010131 | +             | G                  | A            | 68                            | 60                              | 0.941     | 0.53        |
| <i>ZBED3</i>      | rs4457053  | +             | G                  | A            | 26                            | 30                              | 0.995     | 0.47        |
| <i>ZFAND6</i>     | rs11634397 | +             | G                  | A            | 64                            | 65                              | 0.999     | 0.09        |

<sup>a</sup> Descriptives were produced on the InterAct subcohort after exclusion of individuals from Denmark (who had no DNA available) and those from other countries who were not included in the genetic risk score (i.e. were not successfully genotyped for at least 30 of the 35 polymorphisms). #Genotyped SNPs represent published index SNPs, except for *KCNJ11* (index rs5215, proxy rs757110;  $r^2=0.97$ ); *CDKAL1* (index rs7754840, proxy rs10946398;  $r^2=1$ ); *IGF2BP2* (index rs1470579, proxy rs4402960;  $r^2=1$ ); *GCKR* (index rs780094, proxy rs780093;  $r^2=1$ ); *HNF1B/TCF2* (index rs757210, DIAGRAM better meta-analysis SNP rs4430796); *IRS1* (index rs2943641, DIAGRAM better meta-analysis SNP rs7578326).

**ESM Table 4. Proportion of individuals reporting a family history of diabetes in each country in the subcohort: the EPIC-InterAct study.**

| Country      | Family history in any first degree relative |              | Overall Total reporting family history | Missing family history data<br>N (% of total N) |
|--------------|---------------------------------------------|--------------|----------------------------------------|-------------------------------------------------|
|              | +                                           | -            |                                        |                                                 |
| France       | 475                                         | 53           | 765                                    | 102 (12%)                                       |
| %            | 90                                          | 10           |                                        |                                                 |
| UK           | 874                                         | 114          | 1,746                                  | 1 (0.1%)                                        |
| %            | 88                                          | 12           |                                        |                                                 |
| Netherlands  | 1,127                                       | 366          | 2,271                                  | 19 (0.8%)                                       |
| %            | 75                                          | 25           |                                        |                                                 |
| Germany      | 767                                         | 261          | 1,699                                  | 261 (13%)                                       |
| %            | 75                                          | 25           |                                        |                                                 |
| Sweden       | 1,906                                       | 460          | 4,320                                  | 1081 (20%)                                      |
| %            | 81                                          | 19           |                                        |                                                 |
| Denmark      | 1,392                                       | 249          | 3,068                                  | 969 (24%)                                       |
| %            | 85                                          | 15           |                                        |                                                 |
| <i>Total</i> | <i>6,541</i>                                | <i>1,503</i> | <i>13,869</i>                          | <i>Total N=16,302</i>                           |

**ESM Table 6. Association of family history with T2D risk in BMI, physical activity and genetic risk strata**

| BMI group (kg/m <sup>2</sup> ) | Family History in any first degree relative |                      | <i>P</i> <sub>interaction</sub> <sup>a</sup> |
|--------------------------------|---------------------------------------------|----------------------|----------------------------------------------|
|                                | -                                           | +                    |                                              |
| 18.5-24.9                      | 1                                           | 2.91 (2.48, 3.43)    | 0.08                                         |
| 25-29.9                        | 3.81 (2.85, 5.10)                           | 9.18 (6.30, 13.37)   |                                              |
| >=30                           | 10.98 (7.77, 15.51)                         | 22.00 (16.89, 28.65) |                                              |
| <b>Physical activity group</b> |                                             |                      |                                              |
| Active                         | 1                                           | 3.27 (2.73, 3.92)    | 0.048                                        |
| Moderately active              | 1.17 (1.03, 1.33)                           | 3.24 (2.45, 4.29)    |                                              |
| Moderately inactive            | 1.30 (1.12, 1.51)                           | 3.50 (2.84, 4.31)    |                                              |
| Inactive                       | 1.82 (1.54, 2.16)                           | 4.33 (3.58, 5.25)    |                                              |
| <b>Genetic score tertile</b>   |                                             |                      |                                              |
| Low genetic risk               | 1                                           | 2.56 (2.14, 3.06)    | 0.81                                         |
| Medium genetic risk            | 1.40 (1.21, 1.63)                           | 3.83 (3.18, 4.61)    |                                              |
| High genetic risk              | 1.88 (1.61, 2.19)                           | 4.83 (4.02, 5.80)    |                                              |

<sup>a</sup>Interaction is with BMI, PA index and genetic score treated as continuous variables.
