# Supplementary material
Source: PubMed Central journal article supplement (PMC4038917)

# ESM Figure 1

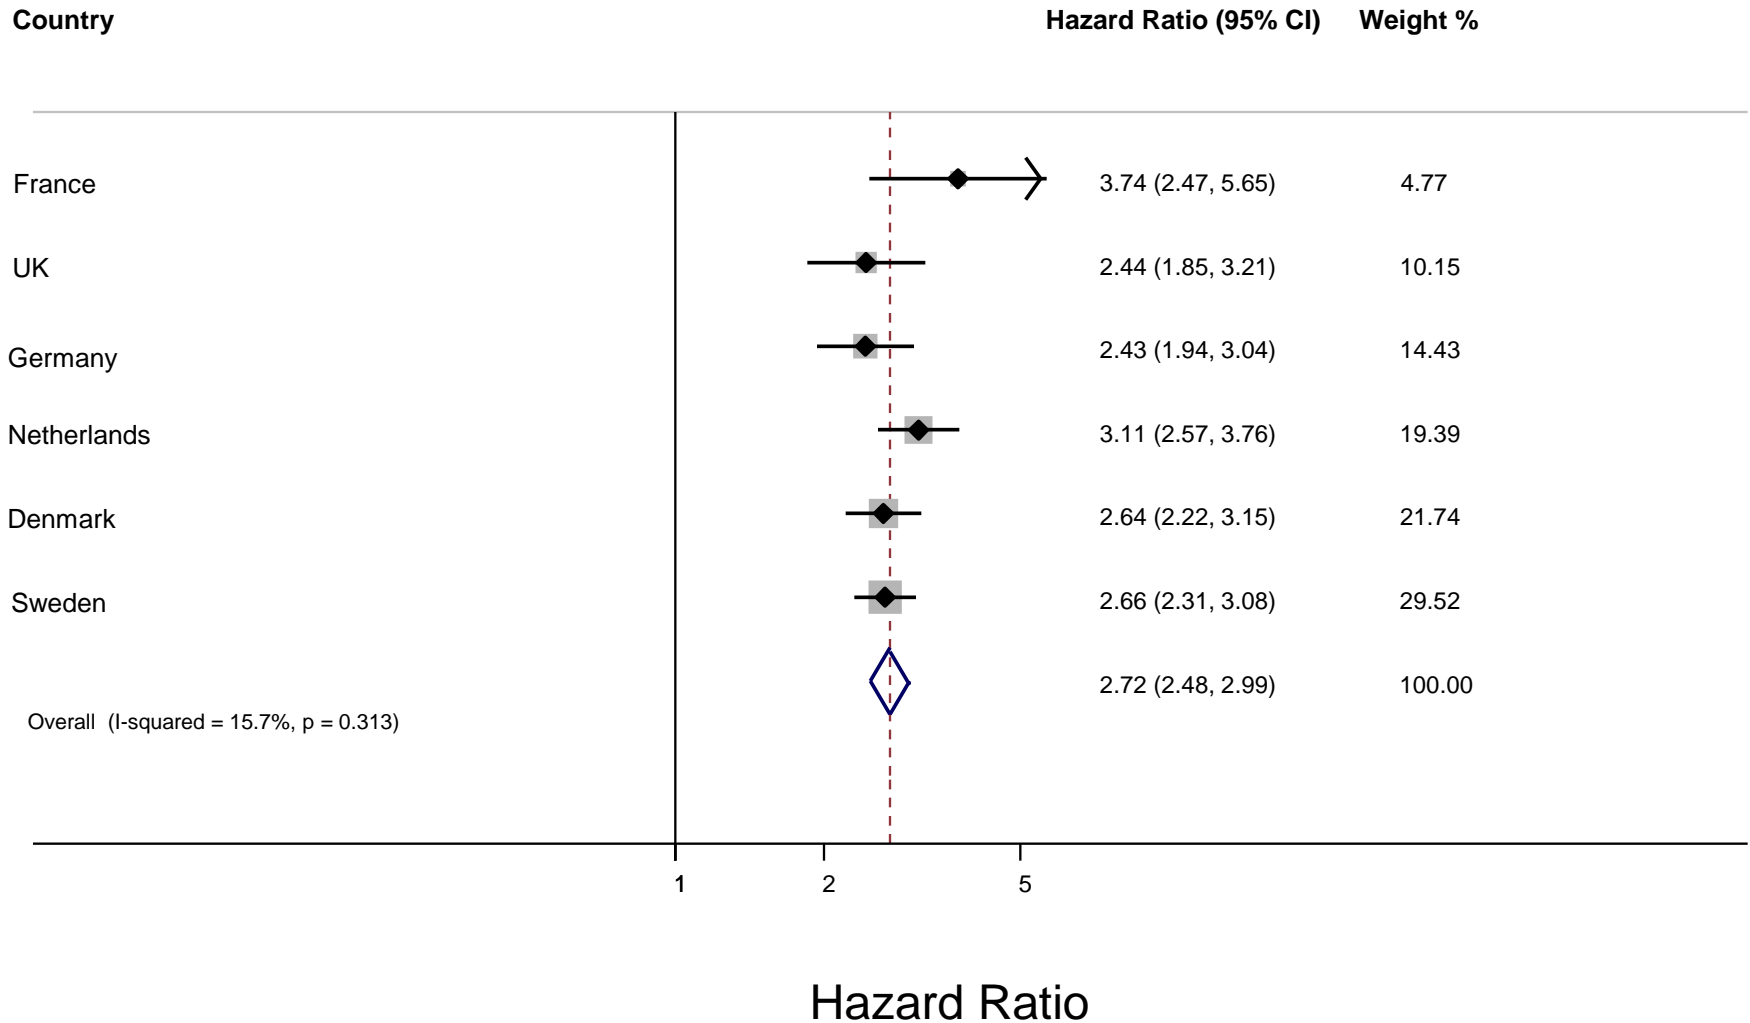

ESM Figure 1. Association of family history with T2D risk by country.

Supplement: NIHMS58594-supplement-01.pdf [file NIHMS58594-supplement-01.pdf]
